# Supplementary material for: Application of Computational Systems Biology to Explore Environmental Toxicity Hazards
Source: PubMed Central journal article supplement (PMC3261980; doi:10.1289/ehp.1103533), 2011-08-17
Supplement: ehp.1103533.s001.pdf [file ehp.1103533.s001.pdf]

## SUPPLEMENTARY MATERIAL

### Application of Computational Systems Biology to Explore Environmental Toxicity

#### Hazards

By Karine Audouze<sup>1</sup> and Philippe Grandjean<sup>2,3</sup>

<sup>1</sup>Center for Biological Sequence Analysis, Department of Systems Biology, Technical University of Denmark, Lyngby, Denmark

<sup>2</sup>Institute of Public Health, University of Southern Denmark, Odense, Denmark; and

<sup>3</sup>Department of Environmental Health, Harvard School of Public Health, Boston, MA, USA

Corresponding author:

Karine Audouze, PhD, Center for Biological Sequence Analysis, Department of Systems Biology, Technical University of Denmark, DK-2800 Lyngby, Denmark.

Phone: +45-45252472. Fax: +45-45931585. E-mail: karine@cbs.dtu.dk

#### Contents

*Supplementary Material, Table 1.* List of human chemical-protein associations extracted from ChemProt. (pp. 2-5)

*Supplementary Material, Table 2.* List of inflammatory, reproductive, neurodevelopmental and cancer diseases predicted to be linked to chemicals using CTD ( $p$ -value adjusted for multiple comparisons) and OMIM (unadjusted  $p$ -value). All associations with  $p$ -values superior to 0.5 are show with the number of gene/protein., where the source corresponds to the database used for the prediction: min ids are OMIM ids and mesh ids are from CTD. (pp. 6-12)

Supplementary Material, Table 1: List of human chemical-protein associations extracted from ChemProt.

| <b>Chemical name</b> | <b>Gene name</b> |
|----------------------|------------------|
| DDE                  | <i>ABCB1</i>     |
| DDE                  | <i>ACVR1C</i>    |
| DDE                  | <i>ACVRL1</i>    |
| DDE                  | <i>AHR</i>       |
| DDE                  | <i>ALK</i>       |
| DDE                  | <i>AR</i>        |
| DDE                  | <i>CYP19A1</i>   |
| DDE                  | <i>CYP1B1</i>    |
| DDE                  | <i>ERBB3</i>     |
| DDE                  | <i>ESR1</i>      |
| DDE                  | <i>ESR2</i>      |
| DDE                  | <i>FSHB</i>      |
| DDE                  | <i>IL4</i>       |
| DDE                  | <i>KIT</i>       |
| DDE                  | <i>PDGFRA</i>    |
| DDE                  | <i>PDGFRB</i>    |
| DDE                  | <i>PGR</i>       |
| DDE                  | <i>SRD5A2</i>    |
| DDT                  | <i>ABCB1</i>     |
| DDT                  | <i>AHR</i>       |
| DDT                  | <i>AR</i>        |
| DDT                  | <i>CASP3</i>     |
| DDT                  | <i>CASP7</i>     |
| DDT                  | <i>CFTR</i>      |
| DDT                  | <i>CYP11A1</i>   |
| DDT                  | <i>CYP1A1</i>    |
| DDT                  | <i>CYP1B1</i>    |
| DDT                  | <i>CYP2B6</i>    |
| DDT                  | <i>CYP3A4</i>    |
| DDT                  | <i>ESR1</i>      |
| DDT                  | <i>ESR2</i>      |
| DDT                  | <i>FOS</i>       |
| DDT                  | <i>GJA1</i>      |
| DDT                  | <i>GNRH1</i>     |
| DDT                  | <i>GPER</i>      |
| DDT                  | <i>HSD17B1</i>   |
| DDT                  | <i>HSD3B1</i>    |
| DDT                  | <i>HSPA5</i>     |
| DDT                  | <i>IL2</i>       |

Supplementary Material, Table 1 (continued)

| <b>Chemical name</b> | <b>Gene name</b> |
|----------------------|------------------|
| DDT                  | <i>IL4</i>       |
| DDT                  | <i>JUN</i>       |
| DDT                  | <i>MAPK1</i>     |
| DDT                  | <i>MAPK14</i>    |
| DDT                  | <i>MAPK3</i>     |
| DDT                  | <i>MAPK8</i>     |
| DDT                  | <i>MAPK9</i>     |
| DDT                  | <i>MT2A</i>      |
| DDT                  | <i>NFKB1</i>     |
| DDT                  | <i>NR112</i>     |
| DDT                  | <i>PGR</i>       |
| DDT                  | <i>POMC</i>      |
| DDT                  | <i>RXRB</i>      |
| DDT                  | <i>TNF</i>       |
| DDT                  | <i>TSHR</i>      |
| o,p'-DDT             | <i>ADAMTS9</i>   |
| o,p'-DDT             | <i>ANAPC1</i>    |
| o,p'-DDT             | <i>AR</i>        |
| o,p'-DDT             | <i>ASRGL1</i>    |
| o,p'-DDT             | <i>BCL2</i>      |
| o,p'-DDT             | <i>BNIP1</i>     |
| o,p'-DDT             | <i>C14ORF138</i> |
| o,p'-DDT             | <i>C6ORF48</i>   |
| o,p'-DDT             | <i>CABLES1</i>   |
| o,p'-DDT             | <i>CAPN9</i>     |
| o,p'-DDT             | <i>CARS</i>      |
| o,p'-DDT             | <i>CHAC2</i>     |
| o,p'-DDT             | <i>CIRBP</i>     |
| o,p'-DDT             | <i>CYP2B6</i>    |
| o,p'-DDT             | <i>CYP3A11</i>   |
| o,p'-DDT             | <i>CYP3A4</i>    |
| o,p'-DDT             | <i>DHRS3</i>     |
| o,p'-DDT             | <i>EDG3</i>      |
| o,p'-DDT             | <i>EIF2B4</i>    |
| o,p'-DDT             | <i>ERBB2</i>     |
| o,p'-DDT             | <i>ERCC3</i>     |
| o,p'-DDT             | <i>ESR1</i>      |
| o,p'-DDT             | <i>ESR2</i>      |
| o,p'-DDT             | <i>ETNK2</i>     |
| o,p'-DDT             | <i>FAM107A</i>   |
| o,p'-DDT             | <i>FOLR1</i>     |

Supplementary Material, Table 1 (continued)

| <b>Chemical name</b> | <b>Gene name</b> |
|----------------------|------------------|
| o,p'-DDT             | <i>FOXD1</i>     |
| o,p'-DDT             | <i>G0S2</i>      |
| o,p'-DDT             | <i>GALNT4</i>    |
| o,p'-DDT             | <i>GALR2</i>     |
| o,p'-DDT             | <i>GDPD5</i>     |
| o,p'-DDT             | <i>GPR142</i>    |
| o,p'-DDT             | <i>HAPLN3</i>    |
| o,p'-DDT             | <i>HES2</i>      |
| o,p'-DDT             | <i>HIST1H2BD</i> |
| o,p'-DDT             | <i>HIVEP1</i>    |
| o,p'-DDT             | <i>HMGN2</i>     |
| o,p'-DDT             | <i>IMPDH2</i>    |
| o,p'-DDT             | <i>KCTD20</i>    |
| o,p'-DDT             | <i>KRT17</i>     |
| o,p'-DDT             | <i>LPPR2</i>     |
| o,p'-DDT             | <i>MAGEA3</i>    |
| o,p'-DDT             | <i>MANSC1</i>    |
| o,p'-DDT             | <i>MAPK1</i>     |
| o,p'-DDT             | <i>MAPK13</i>    |
| o,p'-DDT             | <i>MAPK3</i>     |
| o,p'-DDT             | <i>MEOX1</i>     |
| o,p'-DDT             | <i>MET</i>       |
| o,p'-DDT             | <i>MFGE8</i>     |
| o,p'-DDT             | <i>MFN2</i>      |
| o,p'-DDT             | <i>MLPH</i>      |
| o,p'-DDT             | <i>MRPS7</i>     |
| o,p'-DDT             | <i>NEIL2</i>     |
| o,p'-DDT             | <i>NR1I2</i>     |
| o,p'-DDT             | <i>OLFM1</i>     |
| o,p'-DDT             | <i>OLFML3</i>    |
| o,p'-DDT             | <i>PDCD7</i>     |
| o,p'-DDT             | <i>PELI1</i>     |
| o,p'-DDT             | <i>PGR</i>       |
| o,p'-DDT             | <i>PI4KA</i>     |
| o,p'-DDT             | <i>PIM1</i>      |
| o,p'-DDT             | <i>PKM2</i>      |
| o,p'-DDT             | <i>PLA2G3</i>    |
| o,p'-DDT             | <i>PRKAR2A</i>   |
| o,p'-DDT             | <i>RBM13</i>     |
| o,p'-DDT             | <i>SCAND2</i>    |

Supplementary Material, Table 1 (continued)

| <b>Chemical name</b> | <b>Gene name</b> |
|----------------------|------------------|
| o,p'-DDT             | <i>SF3B5</i>     |
| o,p'-DDT             | <i>SHBG</i>      |
| o,p'-DDT             | <i>SIAH2</i>     |
| o,p'-DDT             | <i>SLC1A5</i>    |
| o,p'-DDT             | <i>SLC31A1</i>   |
| o,p'-DDT             | <i>SLCO2A1</i>   |
| o,p'-DDT             | <i>SQLE</i>      |
| o,p'-DDT             | <i>TGFA</i>      |
| o,p'-DDT             | <i>TGFB2</i>     |
| o,p'-DDT             | <i>THBS1</i>     |
| o,p'-DDT             | <i>TMED4</i>     |
| o,p'-DDT             | <i>TMEM16A</i>   |
| o,p'-DDT             | <i>TSC22D1</i>   |
| o,p'-DDT             | <i>TSPAN12</i>   |
| o,p'-DDT             | <i>TXNIP</i>     |
| o,p'-DDT             | <i>ZKSCAN2</i>   |
| o,p'-DDT             | <i>ZMYM3</i>     |

Supplementary Material, Table 2. List of inflammatory, reproductive, neurodevelopmental and cancer diseases predicted to be linked to chemicals using CTD (*p*-value adjusted for multiple comparisons) and OMIM (unadjusted *p*-value). All associations with *p*-values superior to 0.5 are shown with the number of gene/protein., where the source corresponds to the database used for the prediction: min ids are OMIM ids and mesh ids are from CTD.

| DISEASE                         | CHEMICAL | NUMBER OF GENES | SOURCE           | P-VAL      | LIST OF GENES                                                                                                                                                                                                                                                                              |
|---------------------------------|----------|-----------------|------------------|------------|--------------------------------------------------------------------------------------------------------------------------------------------------------------------------------------------------------------------------------------------------------------------------------------------|
| ANDROGEN INSENSITIVITY SYNDROME | DDE      | 1               | mim:300068       | 0.00628    | <i>AR</i>                                                                                                                                                                                                                                                                                  |
| ANDROGEN INSENSITIVITY SYNDROME | opDDT    | 1               | mim:300068       | 0.0109     | <i>AR</i>                                                                                                                                                                                                                                                                                  |
| ANDROGEN INSENSITIVITY SYNDROME | DDT      | 1               | mim:312300       | 0.0121     | <i>AR</i>                                                                                                                                                                                                                                                                                  |
| ASTHMA                          | DDT      | 48              | mesh<br>:d001249 | 0.0028122  | <i>CFTR;PNRC1;DUSP10;MAPK14;CYP3A4;CYP11A1;TSC22D3;DUSP1;DUSP5;DUSP6;NR0B1;AHR;ERF;ESR1;ETV5;FOS;FOSL2;GJA1;GNRHR;HAL;HSD17B1;IL1B;IL2;AR;JUN;MT2A;NFATC4;NFKB1;NRD1;NTRK3;ABCBI;PLA2G2A;POMC;POU4F1;POU4F2;MAPK1;MAPK3;MAPK8;MAPK9;RAGE;RXRB;TNF;TSHB;CASP3;PLA2G10;CASP7;NR0B2;NR1I2</i> |
| ASTHMA                          | DDT      | 1               | mim:600807       | 0.147      | <i>TNF</i>                                                                                                                                                                                                                                                                                 |
| AUTISM                          | opDDT    | 1               | mim:611015       | 0.0109     | <i>MET</i>                                                                                                                                                                                                                                                                                 |
| BREAST CANCER                   | DDT      | 22              | mesh<br>:d001932 | 0.00095202 | <i>MAPK14;CYP3A4;CYP11A1;FOS;GNRH1;GNRHR;HSPA5;AR;JUN;MT2A;NFKB1;NUCB2;ABCBI;MAPK1;MAPK3;MAPK8;MAPK9;RXRB;TNF;CASP3;CASP7;NR1I2</i>                                                                                                                                                        |
| BREAST CANCER                   | DDE      | 24              | mesh<br>:d001943 | 0.0214     | <i>PNRC1;CYP27A1;NR0B1;AHR;SPRED2;ERBB3;ESR1;ESR2;ETV5;FGF12;FSHB;AR;KIT;PDGFRA;PDGFRB;PGR;ABCBI;POU4F1;POU4F2;WIP1;RNF4;PRDM2;NCOA4;NRG2</i>                                                                                                                                              |
| BREAST CANCER                   | opDDT    | 1               | mim:114480       | 0.189      | <i>HMMR</i>                                                                                                                                                                                                                                                                                |
| BREAST CANCER                   | DDT      | 1               | mim:114480       | 0.208      | <i>HMMR</i>                                                                                                                                                                                                                                                                                |
| COGNITION DISORDERS             | DDT      | 22              | mesh<br>:d003072 | 0.00160218 | <i>MAPK14;CYP3A4;DUSP2;DUSP6;ESR1;ESR2;GJA1;GNRH1;HAL;IL1B;AR;PGR;ABCBI;MAPK1;MAPK3;PTPRR;RXRB;TNF;NCOA4;CASP7;LMNB2;TNFSF11</i>                                                                                                                                                           |

Supplementary Material, Table 2 (continued)

| DISEASE              | CHEMICAL | NUMBER OF GENES | SOURCE           | P-VAL      | LIST OF GENES                                                                                                                                                                                                                               |
|----------------------|----------|-----------------|------------------|------------|---------------------------------------------------------------------------------------------------------------------------------------------------------------------------------------------------------------------------------------------|
| COGNITION DISORDERS  | opDDT    | 22              | mesh<br>:d003072 | 0.00160218 | <i>CYP3A4;DUSP2;DUSP6;ERBB2;ESR1;ESR2;HAL;AR;GAL;PGR;PIMI;MAPK1;MAPK3;PTPRR;BCL2;SHBG;MARCKSL1;TGFB2;THBS1;NCOA4;FYTTD1;LMNB2</i>                                                                                                           |
| COGNITION DISORDERS  | DDE      | 11              | mesh<br>:d003072 | 0.0034056  | <i>CYP27A1;ERBB3;ESR1;ESR2;AR;PDGFRA;PDGFRB;PGR;ABCB1;NCOA4;NRG2</i>                                                                                                                                                                        |
| COLORECTAL CANCER    | DDT      | 40              | mesh<br>:d015179 | 2.14E-07   | <i>DUSP10;CASPI2;MAPK14;CYP3A4;CYP11A1;COMMD6;DUSP2;DUSP3;AHR;ESR1;ESR2;FOS;GJA1;GNRHR;HMMR;HSPA5;IL1B;IL2;AR;JUN;JUNB;NFKB1;NUCB2;PGR;ABCB1;PLA2G2A;MAPK1;MAPK3;MAPK8;MAPK9;RNF4;RXRB;TNF;UGT2B7;PRDM2;CASP3;CASP7;BARX2;TNFSF11;NR112</i> |
| COLORECTAL CANCER    | opDDT    | 1               | mim:114500       | 0.189      | <i>PLA2G2A</i>                                                                                                                                                                                                                              |
| COLORECTAL CANCER    | DDT      | 1               | mim:114500       | 0.208      | <i>PLA2G2A</i>                                                                                                                                                                                                                              |
| COLORECTAL CANCER    | opDDT    | 28              | mesh<br>:d015179 | 0.27864    | <i>TXNIP;AKAP10;CLDN4;CYP3A4;DUSP2;ERBB2;ESR1;ESR2;HMMR;AR;KRT17;BFAR;PGR;PLA2G2A;MAPK1;MAPK3;MAPK13;BCL2;RNF4;SQLE;TGFA;TGFB2;TNFAIP6;UGT2B7;PRDM2;BCL2L14;NR112;MFN2</i>                                                                  |
| CRYPTORCHIDISM       | DDT      | 28              | mesh<br>:d003456 | 4.31E-05   | <i>CFTR;CMTM3;CYP11A1;DUSP1;DUSP6;NR0B1;AHR;ESR1;ESR2;FOS;GJA1;HSD17B1;AR;MT2A;NFKB1;PGR;ABCB1;WIP11;AVPR2;MAPK1;MAPK3;MAPK8;RNF4;NFKBIZ;TNF;TSHR;CASP3;NR112</i>                                                                           |
| CRYPTORCHIDISM       | DDE      | 12              | mesh<br>:d003456 | 0.0056244  | <i>NR0B1;AHR;SPRED2;ERBB3;ESR1;ESR2;FSHB;AR;PGR;ABCB1;WIP11;RNF4</i>                                                                                                                                                                        |
| CRYPTORCHIDISM       | opDDT    | 24              | mesh<br>:d003456 | 0.0086172  | <i>CMTM3;DUSP6;NR0B1;ERBB2;ESR1;ESR2;FMOD;AR;MUC4;GAL;PGR;WIP11;AVPR2;MAPK1;MAPK3;BCL2;RNF4;SHBG;TGFA;GALR2;TSC22D1;NR112;CABLES1;SCARB2</i>                                                                                                |
| DEPRESSIVE DISORDERS | DDT      | 22              | mesh<br>:d003865 | 0.00187566 | <i>MAPK14;CYP3A4;DUSP2;DUSP6;ESR1;ESR2;GJA1;GNRH1;HAL;IL1B;AR;PGR;ABCB1;MAPK1;MAPK3;PTPRR;RXRB;TNF;NCOA4;CASP7;LMNB2;TNFSF11</i>                                                                                                            |
| DEPRESSIVE DISORDERS | opDDT    | 22              | mesh<br>:d003865 | 0.00187566 | <i>CYP3A4;DUSP2;DUSP6;ERBB2;ESR1;ESR2;HAL;AR;GAL;PGR;PIMI;MAPK1;MAPK3;PTPRR;BCL2;SHBG;MARCKSL1;TGFB2;THBS1;NCOA4;FYTTD1;LMNB2</i>                                                                                                           |

Supplementary Material, Table 2 (continued)

| DISEASE              | CHEMICAL | NUMBER OF GENES | SOURCE           | P-VAL      | LIST OF GENES                                                                                                                                                        |
|----------------------|----------|-----------------|------------------|------------|----------------------------------------------------------------------------------------------------------------------------------------------------------------------|
| DEPRESSIVE DISORDERS | DDE      | 11              | mesh<br>:d003865 | 0.003741   | <i>CYP27A1;ERBB3;ESR1;ESR2;AR;PDGFRA;PDGFRB;PGR;ABCB1;NCOA4;NRG2</i>                                                                                                 |
| GASTRIC CANCER       | opDDT    | 1               | mim:137215       | 0.123      | <i>ERBB2</i>                                                                                                                                                         |
| GASTRIC CANCER       | DDT      | 1               | mim:137215       | 0.137      | <i>IL1B</i>                                                                                                                                                          |
| HODGKIN DISEASE      | opDDT    | 26              | mesh<br>:d006689 | 0.0106812  | <i>CLDN4;CYP3A4;DUSP6;ERBB2;ESR1;ESR2;HNF4G;MET;MT1G;PGR;PIM1;MAPK1;MAPK3;MAPK13;BCL2;NSD1;BLVRA;ANAPC1;TGFB2;THBS1;TNFAIP6;DAP3;LMNB2;NR1I2;EIF2B4;TP53I3</i>       |
| HODGKIN DISEASE      | DDE      | 11              | mesh<br>:d006689 | 0.150156   | <i>AHR;ERBB3;ESR1;ESR2;FGF21;KIT;PDGFRB;PGR;ABCB1;NSD1;DAP3</i>                                                                                                      |
| HYPOSPADIAS          | DDE      | 1               | mim:300633       | 0.0125     | <i>AR</i>                                                                                                                                                            |
| HYPOSPADIAS          | opDDT    | 1               | mim:300633       | 0.0217     | <i>AR</i>                                                                                                                                                            |
| HYPOSPADIAS          | DDT      | 1               | mim:300633       | 0.0242     | <i>AR</i>                                                                                                                                                            |
| INFERTILITY          | DDT      | 25              | mesh<br>:d007246 | 0.00036636 | <i>CFTR;CMTM3;CYP11A1;DUSP1;DUSP6;AHR;ESR1;ESR2;FOS;GJA1;HSD17B1;AR;MT2A;NFKB1;PGR;ABCB1;WIP1I;MAPK1;MAPK3;MAPK8;RNF4;NFKBIZ;TNF;CASP3;NR1I2</i>                     |
| INFERTILITY          | DDE      | 11              | mesh<br>:d007246 | 0.0146286  | <i>AHR;SPRED2;ERBB3;ESR1;ESR2;FSHB;AR;PGR;ABCB1;WIP1I;RNF4;CMTM3;DUSP6;ERBB2;ESR1;ESR2;FMOD;AR;MUC4;GAL;PGR;WIP1I;MAPK1;MAPK3;BCL2;RNF4;SHBG;TGFA;TSC22D1;NR1I2;</i> |
| INFERTILITY, FEMALE  | opDDT    | 21              | mesh<br>:d007246 | 0.062694   | <i>CABLES1;SCARB2</i>                                                                                                                                                |
| INFERTILITY, FEMALE  | DDT      | 14              | mesh<br>:d007247 | 1.94E-10   | <i>CYP3A4;ESR1;ESR2;GJA1;IL1B;AR;JUN;NFKB1;PGR;MAPK1;MAPK3;TNF;CASP3;NR1I2</i>                                                                                       |
| INFERTILITY, FEMALE  | opDDT    | 10              | mesh<br>:d007247 | 2.61E-05   | <i>CYP3A4;ESR1;ESR2;AR;PGR;MAPK1;MAPK3;BCL2;SHBG;NR1I2</i>                                                                                                           |
| INFERTILITY, FEMALE  | DDE      | 4               | mesh<br>:d007247 | 0.232716   | <i>ESR1;ESR2;AR;PGR</i>                                                                                                                                              |



Supplementary Material, Table 2 (continued)

| DISEASE                 | CHEMICAL | NUMBER OF GENES | SOURCE           | P-VAL     | LIST OF GENES                                                                                                                                                                                                                                                                                                                                               |
|-------------------------|----------|-----------------|------------------|-----------|-------------------------------------------------------------------------------------------------------------------------------------------------------------------------------------------------------------------------------------------------------------------------------------------------------------------------------------------------------------|
| INFERTILITY, MALE       | DDT      | 58              | mesh<br>:d007248 | 0.0097782 | <i>CFTR;MAPK14;CYP3A4;CYP11A1;DUSP1;DUSP6;AHR;ELK3;ESR1;ESR2;NSUN6;FOS;FOSL2;PLA2G2D;GJA1;GNRH1;COMMD5;HAL;HSD17B1;HSPA5;IL1B;IL2;AR;JUN;JUNB;MT2A;NEO1;NFKB1;NTRK3;FKBP7;PGR;ABCB1;PLA2G1B;PLA2G2A;PLA2G5;POMC;POU4F1;MAPK1;MAPK3;MAPK8;MAPK9;STARD7;PTPRR;NFKBIZ;BLVRA;ZFP36L1;TNF;TSHB;TSHR;UGT2B7;CUEDC2;NCOA4;CASP3;PLA2G10;CASP7;NR0B2;CTSF;NR1I2</i> |
| LEARNING DISORDERS      | DDT      | 25              | mesh<br>:d007859 | 2.16E-15  | <i>CYP3A4;CYP11A1;ESR1;ESR2;FOS;GJA1;GNRH1;HSPA5;IL1B;AR;JUN;MT2A;NFKB1;NTRK3;PGR;ABCB1;POU4F1;MAPK1;MAPK3;MAPK8;RXRB;TNF;CASP3;CASP7;NR1I2</i>                                                                                                                                                                                                             |
| LEARNING DISORDERS      | DDE      | 7               | mesh<br>:d007859 | 0.0108876 | <i>ESR1;ESR2;AR;PDGFRA;PGR;ABCB1;POU4F1</i>                                                                                                                                                                                                                                                                                                                 |
| LEARNING DISORDERS      | opDDT    | 12              | mesh<br>:d007859 | 0.0133902 | <i>CYP3A4;ESR1;ESR2;AR;MET;PGR;POU4F1;MAPK1;MAPK3;BCL2;SHBG;NR1I2</i>                                                                                                                                                                                                                                                                                       |
| LEUKEMIA, ACUTE MYELOID | DDT      | 52              | mesh<br>:d015470 | 4.02E-05  | <i>CFTR;PNRC1;DUSP10;MAPK14;CYP3A4;CYP11A1;TSC22D3;DUSP1;DUSP6;NR0B1;AHR;PAOX;ERF;ESR1;ESR2;ETV5;FOS;GJA1;HAL;HSD17B1;HSPA5;IL1B;IL2;AR;JUN;MT2A;NFKB1;NRD1;NTRK3;NUCB2;ABCB1;PLA2G2A;POU4F1;POU4F2;MAPK1;MAPK3;MAPK8;MAPK9;RAGE;RXRB;NSD1;GRAMD3;ZFP36L1;TNF;TSHB;CASP3;PLA2G10;CASP7;NR0B2;KLF11;TNFSF11;NR1I2</i>                                        |
| LEUKEMIA, ACUTE MYELOID | DDE      | 2               | mim:601626       | 0.00593   | <i>KIT;NSD1</i>                                                                                                                                                                                                                                                                                                                                             |
| LEUKEMIA, ACUTE MYELOID | opDDT    | 44              | mesh<br>:d015470 | 0.086172  | <i>TXNIP;PNRC1;CLDN4;CPT1A;CYP3A4;DUSP6;NR0B1;PAOX;ERBB2;ERF;ESR1;ESR2;ETV5;AKR1B1;HAL;IMPDH2;AR;KRT17;MEOX1;MET;MT1G;MUC4;PAX1;PIMI;PKM2;PLA2G2A;POU4F1;POU4F2;MAPK1;MAPK3;RAB27B;BCL2;NSD1;GRAMD3;BTC;TGFA;TGFB2;THBS1;PLA2G10;KLF11;SCEL;NR1I2;TP53I3;MFN2</i>                                                                                           |
| LEUKEMIA, ACUTE MYELOID | opDDT    | 1               | mim:601626       | 0.189     | <i>NSD1</i>                                                                                                                                                                                                                                                                                                                                                 |
| LEUKEMIA, ACUTE MYELOID | DDT      | 1               | mim:601626       | 0.208     | <i>NSD1</i>                                                                                                                                                                                                                                                                                                                                                 |

Supplementary Material, Table 2 (continued)

| DISEASE          | CHEMICAL | NUMBER OF GENES | SOURCE           | P-VAL       | LIST OF GENES                                                                                                                                                                                                                                                                                                                                                                                                                                                                                                                                                                                                                                                                                                                                                                                                                                                                                                                                                                                                   |
|------------------|----------|-----------------|------------------|-------------|-----------------------------------------------------------------------------------------------------------------------------------------------------------------------------------------------------------------------------------------------------------------------------------------------------------------------------------------------------------------------------------------------------------------------------------------------------------------------------------------------------------------------------------------------------------------------------------------------------------------------------------------------------------------------------------------------------------------------------------------------------------------------------------------------------------------------------------------------------------------------------------------------------------------------------------------------------------------------------------------------------------------|
| LIVER CANCER     | opDDT    | 71              | mesh<br>:d008113 | 0.046698    | <i>APBB3; CORO2B; TXNIP; MAGED2; CMTM3; CLDN4; CPT1A; CYP3A4; DUSP6; PAOX; KRTCAP2; ERBB2; ERCC3; ESR1; ESR2; NSUN6; AKR1B1; FMOD; PLA2G2D; HAL; HNF4G; HPD; AR; KRT17; MET; ASAH1; MT1G; MUC4; GAL; PCTK2; PGR; PIMI; PLA2G2A; WIPI1; ANO1; MAPK1; MAPK3; MAPK13; STARD7; OLFML3; RAB27B; BCL2; RNF4; NSD1; BLVRA; SHBG; ANAPC1; MARCKSL1; GRAMD3; SQLE; TGFA; TGFB2; THBS1; TNFAIP6; UGT2B7; UCK2; VRK2; DAP3; NCOA4; SH3BGRL3; PLA2G10; KLF11; SPSB2; LMNB2; TSC22D1; NR1I2; EIF2B4; CABLES1; SCARB2; TP53I3; MFN2 CFTR; CASP12; CMTM3; MAPK14; PDIK1L; CYP3A4; CYP11A1; TSC22D3; DUSP1; DUSP6; AHR; PAOX; ELK3; ELK4; ESR1; ESR2; NSUN6; FOS; FOSL2; PLA2G2D; GJAI; GNRH1; HAL; HNF4G; HPD; HSD17B1; HSPA5; HTR3A; IL1B; IL2; AR; JUN; JUNB; MT2A; NFATC4; NFKB1; NUCB2; PGR; ABCB1; PLA2G2A; POMC; WIPI1; MAPK1; MAPK3; MAPK8; MAPK9; STARD7; RNF4; NSD1; NFKBIZ; BLVRA; GRAMD3; ZFP36L1; TNF; TSHB; TSHR; UGT2B7; DAP3; NCOA4; CASP3; PLA2G10; CASP7; NR0B2; KLF11; LMNB2; PARG; TNFSF11; CTSE; NR1I2</i> |
| LIVER CANCER     | DDT      | 69              | mesh<br>:d008113 | 0.204336    | <i>CFTR; DUSP10; MAPK14; CYP3A4; CYP11A1; TSC22D3; DUSP1; DUSP6; AHR; PAOX; ELK3; ELK4; ESR1; ESR2; FOS; FOSL2; GJAI; HNF4G; HSPA5; HTR3A; IL1B; IL2; JUN; JUNB; MT2A; NFATC4; NFKB1; NUCB2; PGR; ABCB1; MAPK1; MAPK3; MAPK8; MAPK9; RXRB; NSD1; BLVRA; GRAMD3; ZFP36L1; TNF; TSHB; DAP3; BIRC7; CASP3; CASP7; KLF11; LMNB2; TNFSF11; NR1I2 CFTR; DUSP10; MAPK14; CYP3A4; DUSP1; AHR; ESR1; FOS; IL1B; JUN; NFKB1; NTRK3; ABCB1; POU4F1; MAPK1; MAPK3; MAPK8; ZFP36L1; TNF; BIRC7; CASP3; CASP7; NR1I2</i>                                                                                                                                                                                                                                                                                                                                                                                                                                                                                                      |
| LUNG CANCER      | DDT      | 49              | mesh<br>:d008175 | 3.10E-06    | <i>NTRK3; ABCB1; POU4F1; MAPK1; MAPK3; MAPK8; ZFP36L1; TNF; BIRC7; CASP3; CASP7; NR1I2</i>                                                                                                                                                                                                                                                                                                                                                                                                                                                                                                                                                                                                                                                                                                                                                                                                                                                                                                                      |
| MEMORY DISORDERS | DDT      | 23              | mesh<br>:d008569 | 1.17E-14    | <i>AHR; ERBB3; ESR1; PDGFRA; ABCB1; POU4F1</i>                                                                                                                                                                                                                                                                                                                                                                                                                                                                                                                                                                                                                                                                                                                                                                                                                                                                                                                                                                  |
| MEMORY DISORDERS | DDE      | 6               | mesh<br>:d008569 | 0.05676     | <i>ALK</i>                                                                                                                                                                                                                                                                                                                                                                                                                                                                                                                                                                                                                                                                                                                                                                                                                                                                                                                                                                                                      |
| NEUROBLASTOMA    | DDE      | 1               | mim:256700       | 0.0249      | <i>CFTR; PNRC1; DUSP10; MAPK14; CYP3A4; CYP11A1; CYP11B2; TSC22D3; DUSP1; DUSP6; NR0B1; AHR; PAOX; ERF; ESR1; ESR2; ETV5; FOS; FOSL2; GJAI; GNRHR; HAL; HSD17B1; HSPA5; IL1B; IL2; AR; JUN; JUNB; MT2A; NFKB1; NRD1; NTRK3; NUCB2; ABCB1; PLA2G2A; POU4F1; POU4F2; MAPK1; MAPK3; MAPK8; MAPK9; RAGE; RNF4; RXRB; GRAMD3; ZFP36L1; TNF; TSHB; CASP3; PLA2G10; CASP7; NR0B2; KLF11; NR1I2</i>                                                                                                                                                                                                                                                                                                                                                                                                                                                                                                                                                                                                                     |
| PROSTATE CANCER  | DDT      | 55              | mesh<br>:d010190 | 0.000106554 | <i>CFTR; PNRC1; DUSP10; MAPK14; CYP3A4; CYP11A1; CYP11B2; TSC22D3; DUSP1; DUSP6; NR0B1; AHR; PAOX; ERF; ESR1; ESR2; ETV5; FOS; FOSL2; GJAI; GNRHR; HAL; HSD17B1; HSPA5; IL1B; IL2; AR; JUN; JUNB; MT2A; NFKB1; NRD1; NTRK3; NUCB2; ABCB1; PLA2G2A; POU4F1; POU4F2; MAPK1; MAPK3; MAPK8; MAPK9; RAGE; RNF4; RXRB; GRAMD3; ZFP36L1; TNF; TSHB; CASP3; PLA2G10; CASP7; NR0B2; KLF11; NR1I2</i>                                                                                                                                                                                                                                                                                                                                                                                                                                                                                                                                                                                                                     |

Supplementary Material, Table 2 (continued)

| DISEASE           | CHEMICAL | NUMBER OF GENES | SOURCE        | P-VAL     | LIST OF GENES                                                                                                                                                                                                                                                                                                                                                                                                                         |
|-------------------|----------|-----------------|---------------|-----------|---------------------------------------------------------------------------------------------------------------------------------------------------------------------------------------------------------------------------------------------------------------------------------------------------------------------------------------------------------------------------------------------------------------------------------------|
| PROSTATE CANCER   | opDDT    | 70              | mesh :d011471 | 0.034314  | <i>TXNIP;PNRC1;CMTM3;CLDN4;CPT1A;CYP3A4;DUSP2;DUSP5;DUSP6;DUSP9;ERBB2;ERCC3;ERF;ESR1;ESR2;NSUN6;AKR1B1;FMOD;HAL;HNF4G;HPD;AR;KRT17;MET;MT1F;MT1G;MUC4;GAL;PGR;PIMI;PLA2G1B;WIP11;NUDT11;MAPK1;MAPK3;MAPK13;OLFML3;PTPRR;BCL2;RNF4;NSD1;BLVRA;SHBG;ANAPC1;SLC1A5;MARCKSL1;BNIP1;SQLE;TGFA;TGFB2;THBS1;TNFAIP6;UGT2B7;PRDM2;DAP3;MLPH;BCL2L14;NCOA4;PLA2G10;FYTTD1;KLF11;LMNB2;SCEL;TSC22D1;NR112;EIF2B4;CABLES1;SCARB2;TP53I3;MFN2</i> |
| PROSTATE CANCER   | DDE      | 1               | mim:176807    | 0.124     | <i>AR</i>                                                                                                                                                                                                                                                                                                                                                                                                                             |
| PROSTATE CANCER   | opDDT    | 1               | mim:176807    | 0.206     | <i>AR</i>                                                                                                                                                                                                                                                                                                                                                                                                                             |
| PROSTATE CANCER   | DDT      | 1               | mesh :d012559 | 0.227     | <i>AR</i>                                                                                                                                                                                                                                                                                                                                                                                                                             |
| SCHIZOPHRENIA     | DDT      | 16              | mesh :d012559 | 0.0034056 | <i>CYP11A1;FOS;APOL2;GJAI;GNRH1;IL2;AR;JUN;MT2A;NFKB1;MAPK1;MAPK3;MAPK8;TNF;CASP3;CASP7</i>                                                                                                                                                                                                                                                                                                                                           |
| SCHIZOPHRENIA     | DDE      | 1               | mim:181500    | 0.152     | <i>APOL2</i>                                                                                                                                                                                                                                                                                                                                                                                                                          |
| SCHIZOPHRENIA     | opDDT    | 1               | mim:181500    | 0.249     | <i>APOL2</i>                                                                                                                                                                                                                                                                                                                                                                                                                          |
| SCHIZOPHRENIA     | DDT      | 1               | mim:181500    | 0.273     | <i>APOL2</i>                                                                                                                                                                                                                                                                                                                                                                                                                          |
| SEX REVERSAL      | DDE      | 1               | mim:300018    | 0.00628   | <i>NR0B1</i>                                                                                                                                                                                                                                                                                                                                                                                                                          |
| SEX REVERSAL      | opDDT    | 1               | mim:300018    | 0.0109    | <i>NR0B1</i>                                                                                                                                                                                                                                                                                                                                                                                                                          |
| SEX REVERSAL      | DDT      | 1               | mim:300018    | 0.0121    | <i>NR0B1</i>                                                                                                                                                                                                                                                                                                                                                                                                                          |
| SOTOS SYNDROME    | DDE      | 1               | mim:117550    | 0.00628   | <i>NSD1</i>                                                                                                                                                                                                                                                                                                                                                                                                                           |
| SOTOS SYNDROME    | opDDT    | 1               | mim:117550    | 0.0109    | <i>NSD1</i>                                                                                                                                                                                                                                                                                                                                                                                                                           |
| SOTOS SYNDROME    | DDT      | 1               | mim:117550    | 0.0121    | <i>NSD1</i>                                                                                                                                                                                                                                                                                                                                                                                                                           |
| TESTICULAR CANCER | DDT      | 10              | mesh :d013736 | 0.0037668 | <i>CYP3A4;GJAI;JUN;MT2A;ABCB1;MAPK1;MAPK3;ZFP36L1;CASP3;NR112</i>                                                                                                                                                                                                                                                                                                                                                                     |

Supplementary Material, Table 2 (continued)

| DISEASE                          | CHEMICAL | NUMBER OF GENES | SOURCE           | P-VAL      | LIST OF GENES                                                                                                                                                                                                                                                          |
|----------------------------------|----------|-----------------|------------------|------------|------------------------------------------------------------------------------------------------------------------------------------------------------------------------------------------------------------------------------------------------------------------------|
| TESTICULAR CANCER                | DDE      | 1               | mim:273300       | 0.0125     | <i>KIT</i>                                                                                                                                                                                                                                                             |
| THYROID CANCER                   | DDT      | 45              | mesh<br>:d013964 | 0.00046698 | <i>CFTR;PNRC1;DUSP10;MAPK14;CYP3A4;CYP11A1;TSC22D3;DUSP1;DUSP3;DUSP6;NR0B1;AHR;ERF;ESR1;ETV5;FOS;GJA1;HAL;HSD17B1;IL1B;IL2;AR;JUN;NFKB1;NRD1;NTRK3;PGR;ABCB1;PLA2G2A;POU4F1;POU4F2;MAPK1;MAPK3;MAPK8;MAPK9;RAGE;RXRB;TNF;TSHB;TSHR;CASP3;PLA2G10;CASP7;NR0B2;NR1I2</i> |
| THYROID CANCER                   | DDE      | 1               | mim:188550       | 0.0432     | <i>NCOA4</i>                                                                                                                                                                                                                                                           |
| THYROID CANCER                   | opDDT    | 1               | mim:188550       | 0.0739     | <i>NCOA4</i>                                                                                                                                                                                                                                                           |
| THYROID CANCER                   | DDT      | 1               | mim:188550       | 0.0821     | <i>NCOA4</i>                                                                                                                                                                                                                                                           |
| TYPE II DIABETES WEAVER SYNDROME | DDT      | 40              | mesh_d003924     | 1.22E-05   | <i>CFTR;PNRC1;MAPK14;CYP3A4;CYP11A1;TSC22D3;DUSP1;AHR;ESR1;ESR2;FOS;FOSL2;GJA1;HAL;HSD17B1;HSPA5;IL1B;IL2;AR;JUN;JUNB;MT2A;NFKB1;PGR;ABCB1;PLA2G1B;POMC;MAPK1;MAPK3;MAPK8;SCN8A;NFKBIZ;ZFP36L1;TNF;TSHB;UGT2B7;CASP3;NR0B2;TNFSF11;NR1I2</i>                           |
| WEAVER SYNDROME                  | DDE      | 1               | mim:277590       | 0.00628    | <i>NSDI</i>                                                                                                                                                                                                                                                            |
| WEAVER SYNDROME                  | opDDT    | 1               | mim:277590       | 0.0109     | <i>NSDI</i>                                                                                                                                                                                                                                                            |
| WEAVER SYNDROME                  | DDT      | 1               | mim:277590       | 0.0121     | <i>NSDI</i>                                                                                                                                                                                                                                                            |
